# Supplementary material for: Comparative Transcriptomics Profiling of Perennial Ryegrass Infected with Wild Type or a ΔvelA Epichloë festucae Mutant Reveals Host Processes Underlying Mutualistic versus Antagonistic Interactions
Source: MDPI journal article supplement (doi:10.3390/jof9020190), 2023-02-01
Supplement: s1 [file s1]

**Table S1-** General description of mRNA-sequencing results

| mRNA-sequencing reads                                     | In planta   |
|-----------------------------------------------------------|-------------|
| Total read number                                         | 810,694,678 |
| Number of total reads after quality trimming              | 809,938,396 |
| Percentage of total reads after quality trimming          | 99.91%      |
| Number of mapped reads                                    | 724,293,326 |
| Proportion of mapped reads (% of trimmed reads)           | 89.43%      |
| Number of reads mapped to Endophyte genome                | 13,360,773  |
| Percentage of mapped fungal reads to total mapped reads   | 1.84%       |
| Number of reads mapped to Ryegrass genome                 | 710,932,553 |
| Percentage of mapped ryegrass reads to total mapped reads | 98.16%      |

**Table S2-** DEGs encode proteins involved in RNA metabolism (RNA transcription, regulation of transcription, RNA processing). Fold changes show in bold are statistically significant (FDR≤0.05) changed more than two times. Empty fold change cells are representative of not expressed gene in both compared strains.

| Gene ID           | Bincode Name                                                                                             | Fold Change  |                      |                    |              |                       |                     |
|-------------------|----------------------------------------------------------------------------------------------------------|--------------|----------------------|--------------------|--------------|-----------------------|---------------------|
|                   |                                                                                                          | S WT-(E-)    | S $\Delta$ ve1A-(E-) | S $\Delta$ ve1A-WT | IP WT-(E-)   | IP $\Delta$ ve1A-(E-) | IP $\Delta$ ve1A-WT |
| 3844 0040294-0.1  | 'RNA.regulation of transcription.AP2/EREBP, APETALA2/Ethylene-responsive element binding protein family' | -1.44        | <b>3.87</b>          | <b>5.56</b>        |              |                       |                     |
| 147 0025650-0.0   | 'RNA.regulation of transcription.ARR'                                                                    | 1.93         | <b>2.47</b>          | 1.28               | -1.71        | -1.11                 | 1.54                |
| 2364 0012727-0.2  | 'RNA.regulation of transcription.ARR'                                                                    | 1.27         | <b>2.16</b>          | 1.70               | -2.08        | -1.08                 | 1.92                |
| 9362 0031205-0.0  | 'RNA.regulation of transcription.ARR'                                                                    | -1.03        | <b>3.69</b>          | <b>3.81</b>        | -1.09        | 1.27                  | 1.38                |
| 11344 0035200-0.0 | 'RNA.regulation of transcription.bHLH,Basic Helix-Loop-Helix family'                                     | -1.79        | <b>7.05</b>          | <b>12.60</b>       | <b>-7.96</b> | <b>-47.80</b>         | <b>-6.00</b>        |
| 12784 0025142-0.0 | 'RNA.regulation of transcription.bHLH,Basic Helix-Loop-Helix family'                                     | -2.01        | <b>-7.71</b>         | <b>-3.83</b>       |              |                       |                     |
| 17470 0028125-0.0 | 'RNA.regulation of transcription.bHLH,Basic Helix-Loop-Helix family'                                     | -1.17        | -1.10                | 1.07               | <b>6.65</b>  | <b>11.29</b>          | 1.70                |
| 3713 0000708-0.1  | 'RNA.regulation of transcription.bHLH,Basic Helix-Loop-Helix family'                                     | -2.10        | 1.11                 | <b>2.34</b>        |              |                       |                     |
| 3792 0047500-0.0  | 'RNA.regulation of transcription.bHLH,Basic Helix-Loop-Helix family'                                     | -1.21        | <b>-2.87</b>         | -2.38              |              |                       |                     |
| 4747 0030631-0.1  | 'RNA.regulation of transcription.bHLH,Basic Helix-Loop-Helix family'                                     | <b>-2.07</b> | -1.37                | 1.51               | 1.88         | 1.06                  | -1.76               |
| 6305 0035940-0.0  | 'RNA.regulation of transcription.bHLH,Basic Helix-Loop-Helix family'                                     | -1.28        | <b>-3.22</b>         | <b>-2.52</b>       | 1.75         | <b>8.44</b>           | <b>4.82</b>         |
| 6305 0035940-0.1  | 'RNA.regulation of transcription.bHLH,Basic Helix-Loop-Helix family'                                     | -1.37        | <b>-3.23</b>         | <b>-2.35</b>       | 2.08         | <b>33.65</b>          | <b>16.19</b>        |
| 6831 0001693-0.0  | 'RNA.regulation of transcription.bHLH,Basic Helix-Loop-Helix family'                                     | 1.24         | <b>2.74</b>          | <b>2.21</b>        | -2.19        | 1.11                  | 2.43                |
| 8268 0029681-0.0  | 'RNA.regulation of transcription.bHLH,Basic Helix-Loop-Helix family'                                     | 1.93         | <b>3.65</b>          | 1.90               |              |                       |                     |
| 8775 0031402-0.0  | 'RNA.regulation of transcription.bHLH,Basic Helix-Loop-Helix family'                                     | <b>-2.85</b> | <b>2.52</b>          | <b>7.18</b>        | -2.18        | <b>-6.70</b>          | -3.07               |
| 1431 0015715-0.3  | 'RNA.regulation of transcription.bZIP transcription factor family'                                       | 1.11         | -1.09                | -1.20              | <b>4.81</b>  | -2.00                 | <b>-9.60</b>        |
| 10840 0020844-0.0 | 'RNA.regulation of transcription.C2C2(Zn) CO-like, Constans-like zinc finger family'                     | <b>-3.76</b> | -1.21                | <b>3.12</b>        | 2.30         | 3.38                  | 1.47                |
| 14292 0002956-0.0 | 'RNA.regulation of transcription.C2C2(Zn) CO-like, Constans-like zinc finger family'                     | <b>-3.22</b> | -1.36                | <b>2.36</b>        | 1.84         | 2.15                  | 1.17                |
| 2645 0017739-0.0  | 'RNA.regulation of transcription.C2C2(Zn) CO-like, Constans-like zinc finger family'                     | 1.35         | -1.51                | <b>-2.04</b>       | -1.22        | -1.12                 | 1.09                |
| 4172 0027178-0.1  | 'RNA.regulation of transcription.C2C2(Zn) CO-                                                            | 1.99         | -1.27                | <b>-2.52</b>       | -1.09        | -1.31                 | -1.20               |

|                   |                                                                                      |              |              |              |                |                |               |
|-------------------|--------------------------------------------------------------------------------------|--------------|--------------|--------------|----------------|----------------|---------------|
|                   | like, Constans-like zinc finger family'                                              |              |              |              |                |                |               |
| 5346 0024732-0.3  | 'RNA.regulation of transcription.C2C2(Zn) CO-like, Constans-like zinc finger family' | <b>-3.21</b> | -1.18        | <b>2.73</b>  | 1.52           | 1.60           | 1.05          |
| 12108 0008083-0.1 | 'RNA.regulation of transcription.C2C2(Zn) DOF zinc finger family'                    | <b>-3.65</b> | -1.71        | <b>2.13</b>  | 1.42           | 1.12           | -1.27         |
| 1517 0023937-0.3  | 'RNA.regulation of transcription.C2C2(Zn) DOF zinc finger family'                    | <b>-2.77</b> | -1.09        | <b>2.54</b>  | 1.87           | 2.31           | 1.23          |
| 20491 0015122-0.0 | 'RNA.regulation of transcription.C2H2 zinc finger family'                            | 1.39         | <b>2.36</b>  | 1.70         | -1.19          | 1.15           | 1.37          |
| 2402 0024285-0.0  | 'RNA.regulation of transcription.C2H2 zinc finger family'                            | 1.10         | 1.11         | 1.01         | 2.05           | -2.37          | <b>-4.86</b>  |
| 3255 0017506-0.0  | 'RNA.regulation of transcription.C2H2 zinc finger family'                            | 2.21         | <b>3.33</b>  | 1.50         |                |                |               |
| 9254 0010925-0.0  | 'RNA.regulation of transcription.C2H2 zinc finger family'                            | 1.08         | -1.06        | -1.15        | 4.31           | -1.72          | <b>-7.43</b>  |
| 1903 0001342-0.3  | 'RNA.regulation of transcription.Chromatin Remodeling Factors'                       | 1.07         | 1.44         | 1.35         | <b>-623.32</b> | -2.91          | <b>209.35</b> |
| 1937 0031964-0.1  | 'RNA.regulation of transcription.Chromatin Remodeling Factors'                       | -1.32        | -1.35        | -1.03        | <b>1511.81</b> | <b>3326.33</b> | 2.61          |
| 3398 0039790-0.2  | 'RNA.regulation of transcription.DNA methyltransferases'                             | 1.54         | -1.09        | -1.68        | 3.17           | -2.83          | <b>-8.99</b>  |
| 6504 0036370-0.0  | 'RNA.regulation of transcription.DNA methyltransferases'                             | 1.29         | <b>-2.94</b> | <b>-3.78</b> |                |                |               |
| 3445 0010060-0.0  | 'RNA.regulation of transcription.G2-like transcription factor family, GARP'          | <b>-2.12</b> | -1.44        | 1.47         | 1.90           | 1.20           | -1.58         |
| 557 0013553-0.0   | 'RNA.regulation of transcription.G2-like transcription factor family, GARP'          | <b>-2.27</b> | -1.08        | <b>2.10</b>  | -1.02          | 1.03           | 1.04          |
| 1541 0030919-0.0  | 'RNA.regulation of transcription.HB,Homeobox transcription factor family'            | 1.46         | 1.62         | 1.11         | <b>5.11</b>    | 1.40           | -3.65         |
| 3204 0012050-0.1  | 'RNA.regulation of transcription.HB,Homeobox transcription factor family'            | -1.37        | -1.23        | 1.12         | 2.76           | -4.65          | <b>-12.88</b> |
| 7825 0043151-0.0  | 'RNA.regulation of transcription.HB,Homeobox transcription factor family'            | 1.16         | <b>2.12</b>  | 1.83         |                |                |               |
| 10734 0046517-0.1 | 'RNA.regulation of transcription.HSF,Heat-shock transcription factor family'         | <b>2.23</b>  | 1.07         | <b>-2.09</b> | 1.73           | -1.09          | -1.89         |
| 16643 0040016-0.1 | 'RNA.regulation of transcription.HSF,Heat-shock transcription factor family'         | 1.94         | -1.12        | <b>-2.17</b> | 1.33           | 2.80           | 2.12          |
| 2069 0002052-0.2  | 'RNA.regulation of transcription.MADS box transcription factor family'               | -1.27        | -1.57        | -1.24        | 4.13           | -1.15          | <b>-4.74</b>  |
| 2923 0025539-0.0  | 'RNA.regulation of transcription.MADS box transcription factor family'               | 1.43         | <b>3.08</b>  | 2.15         |                |                |               |

|                   |                                                                           |              |             |              |                |               |               |
|-------------------|---------------------------------------------------------------------------|--------------|-------------|--------------|----------------|---------------|---------------|
| 7524 0034213-0.0  | 'RNA.regulation of transcription.MADS box transcription factor family'    | 1.21         | -1.78       | <b>-2.16</b> | 1.18           | -1.20         | -1.42         |
| 2307 0023751-0.0  | 'RNA.regulation of transcription.MYB domain transcription factor family'  | -1.50        | <b>2.42</b> | <b>3.63</b>  |                |               |               |
| 28835 0029238-0.0 | 'RNA.regulation of transcription.MYB domain transcription factor family'  | 1.07         | 1.03        | -1.04        | -1.55          | <b>-8.26</b>  | <b>-5.33</b>  |
| 405 0021379-0.2   | 'RNA.regulation of transcription.MYB domain transcription factor family'  | 1.31         | -1.80       | <b>-2.36</b> |                |               |               |
| 5759 0024249-0.0  | 'RNA.regulation of transcription.MYB domain transcription factor family'  | <b>3.12</b>  | -1.28       | <b>-3.99</b> | 1.13           | 1.36          | 1.21          |
| 5934 0044269-0.0  | 'RNA.regulation of transcription.MYB domain transcription factor family'  | -1.80        | 1.48        | <b>2.65</b>  | 1.17           | -1.83         | -2.13         |
| 691 0011197-0.3   | 'RNA.regulation of transcription.MYB domain transcription factor family'  | -1.30        | 1.74        | <b>2.25</b>  |                |               |               |
| 15721 0015845-0.0 | 'RNA.regulation of transcription.MYB-related transcription factor family' | 1.09         | <b>3.22</b> | <b>2.96</b>  |                |               |               |
| 4082 0025941-0.0  | 'RNA.regulation of transcription.MYB-related transcription factor family' | <b>-3.71</b> | -1.27       | <b>2.92</b>  | 3.32           | <b>4.59</b>   | 1.38          |
| 4972 0039514-0.0  | 'RNA.regulation of transcription.MYB-related transcription factor family' | 1.34         | 1.17        | -1.14        | <b>-103.96</b> | -4.47         | <b>23.24</b>  |
| 7202 0017613-0.0  | 'RNA.regulation of transcription.MYB-related transcription factor family' | <b>-2.87</b> | -1.32       | <b>2.18</b>  | 2.56           | 3.54          | 1.38          |
| 873 0029587-0.1   | 'RNA.regulation of transcription.MYB-related transcription factor family' | 1.13         | <b>2.56</b> | <b>2.26</b>  |                |               |               |
| 2733 0022591-0.0  | 'RNA.regulation of transcription.NAC domain transcription factor family'  | -1.79        | 1.18        | <b>2.10</b>  | -1.43          | -1.90         | -1.34         |
| 3994 0007765-0.1  | 'RNA.regulation of transcription.NAC domain transcription factor family'  | <b>-2.67</b> | -1.39       | 1.93         | <b>5.28</b>    | 1.01          | <b>-5.20</b>  |
| 6009 0025573-0.0  | 'RNA.regulation of transcription.NAC domain transcription factor family'  | 1.99         | -1.04       | <b>-2.08</b> | -1.54          | -2.48         | -1.61         |
| 2926 0025544-0.0  | 'RNA.regulation of transcription.Psdo ARR transcription factor family'    | <b>-2.36</b> | -1.54       | 1.53         | 1.24           | 1.16          | -1.07         |
| 4675 0001294-0.0  | 'RNA.regulation of transcription.putative transcription regulator'        | -1.47        | -1.74       | -1.18        | <b>6.04</b>    | -1.78         | <b>-10.73</b> |
| 10500 0032179-0.2 | 'RNA.regulation of transcription.unclassified'                            | 1.40         | 1.40        | -1.00        | <b>7.22</b>    | 3.85          | -1.87         |
| 14522 0016919-0.2 | 'RNA.regulation of transcription.unclassified'                            | -1.29        | 1.89        | <b>2.43</b>  | -1.34          | -1.39         | -1.03         |
| 17402 0022797-0.0 | 'RNA.regulation of transcription.unclassified'                            | -1.57        | -1.25       | 1.26         | <b>195.64</b>  | <b>512.61</b> | 2.74          |
| 316 0002700-0.0   | 'RNA.regulation of transcription.unclassified'                            | -1.73        | 1.23        | <b>2.13</b>  | -1.11          | <b>-6.47</b>  | <b>-5.83</b>  |
| 3647 0041486-0.1  | 'RNA.regulation of transcription.unclassified'                            | -1.58        | 1.44        | <b>2.28</b>  | -1.39          | -1.95         | -1.40         |
| 917 0038170-0.6   | 'RNA.regulation of transcription.unclassified'                            | -1.26        | 1.12        | 1.41         | -1.27          | 4.36          | <b>5.56</b>   |
| 9201 0005498-0.1  | 'RNA.regulation of transcription.unclassified'                            | -1.19        | 1.52        | 1.81         | <b>-6.51</b>   | -4.40         | 1.48          |

|                   |                                                                           |              |             |             |               |                |                 |
|-------------------|---------------------------------------------------------------------------|--------------|-------------|-------------|---------------|----------------|-----------------|
| 11930 0014594-0.0 | 'RNA.regulation of transcription.WRKY domain transcription factor family' | -1.07        | <b>2.05</b> | <b>2.21</b> | -1.55         | -1.84          | -1.19           |
| 224 0023185-0.1   | 'RNA.regulation of transcription.WRKY domain transcription factor family' | 1.50         | <b>3.34</b> | <b>2.22</b> | 1.27          | 2.03           | 1.60            |
| 3427 0047537-0.1  | 'RNA.regulation of transcription.WRKY domain transcription factor family' | 1.15         | <b>2.86</b> | <b>2.50</b> |               |                |                 |
| 3946 0006688-0.0  | 'RNA.regulation of transcription.WRKY domain transcription factor family' | -1.31        | 1.82        | <b>2.38</b> | 1.20          | 1.54           | 1.29            |
| 5265 0022303-0.1  | 'RNA.regulation of transcription.WRKY domain transcription factor family' | 1.37         | <b>2.95</b> | <b>2.15</b> | -1.07         | 2.22           | 2.38            |
| 637 0045345-0.0   | 'RNA.regulation of transcription.WRKY domain transcription factor family' | -1.46        | 1.53        | <b>2.23</b> | -1.31         | -2.10          | -1.61           |
| 6432 0018061-0.0  | 'RNA.regulation of transcription.WRKY domain transcription factor family' | -1.96        | 1.36        | <b>2.66</b> |               |                |                 |
| 7925 0032956-0.0  | 'RNA.regulation of transcription.WRKY domain transcription factor family' | -1.04        | <b>3.82</b> | <b>3.98</b> | -2.50         | -2.71          | -1.08           |
| 9874 0038606-0.0  | 'RNA.regulation of transcription.WRKY domain transcription factor family' | <b>-2.50</b> | 1.48        | <b>3.68</b> | <b>-6.12</b>  | <b>-6.54</b>   | -1.07           |
| 4193 0041308-0.0  | 'RNA.RNA binding'                                                         | 1.22         | 1.26        | 1.03        | 2.54          | <b>-569.81</b> | <b>-1581.76</b> |
| 1189 0015287-0.3  | 'RNA.transcription'                                                       | -1.12        | -1.05       | 1.06        | <b>14.01</b>  | <b>19.44</b>   | 1.39            |
| 15129 0001576-0.0 | 'RNA.processing.RNA helicase'                                             | -1.18        | 1.25        | 1.47        | <b>260.84</b> | <b>105.58</b>  | -2.42           |

**Table S3-** DEGs encode proteins involved in nucleotide metabolism (Synthesis, degradation and salvage). Fold changes show in bold are statistically significant (FDR≤0.05) changed more than two times.

| Gene ID           | Bincode Name                                                                   | Fold Change  |                      |                    |              |                       |                     |
|-------------------|--------------------------------------------------------------------------------|--------------|----------------------|--------------------|--------------|-----------------------|---------------------|
|                   |                                                                                | S WT-(E-)    | S $\Delta$ veIA-(E-) | S $\Delta$ veIA-WT | IP WT-(E-)   | IP $\Delta$ veIA-(E-) | IP $\Delta$ veIA-WT |
| 18772 0007075-0.0 | 'nucleotide metabolism.salvage.phosphoribosyltransferases.aprt'                | -1.65        | 1.30                 | <b>2.15</b>        | 1.18         | 1.18                  | -1.01               |
| 2374 0043192-0.1  | 'nucleotide metabolism.degradation.pyrimidine.beta-ureidopropionase'           | 1.31         | 1.12                 | -1.16              | <b>-8.39</b> | -2.21                 | 3.79                |
| 2441 0047435-0.0  | 'nucleotide metabolism.deoxynucleotide metabolism.pseudouridine synthase'      | <b>-2.43</b> | -1.36                | 1.79               | <b>5.55</b>  | 1.09                  | <b>-5.08</b>        |
| 4196 0041311-0.2  | 'nucleotide metabolism.salvage.phosphoribosyltransferases.aprt'                | 1.55         | <b>2.46</b>          | 1.59               | -1.58        | -1.26                 | 1.26                |
| 6732 0019325-0.0  | 'nucleotide metabolism.degradation.purine'                                     | <b>-3.36</b> | -1.34                | <b>2.50</b>        | -1.04        | -3.94                 | -3.79               |
| 8947 0012172-0.0  | 'nucleotide metabolism.synthesis.pyrimidine.orotate phosphoribosyltransferase' | 1.41         | 1.86                 | 1.32               | -1.49        | 3.57                  | <b>5.33</b>         |
| 18772 0007075-0.0 | 'nucleotide metabolism.salvage.phosphoribosyltransferases.aprt'                | -1.65        | 1.30                 | <b>2.15</b>        | 1.18         | 1.18                  | -1.01               |
| 2374 0043192-0.1  | 'nucleotide metabolism.degradation.pyrimidine.beta-ureidopropionase'           | 1.31         | 1.12                 | -1.16              | <b>-8.39</b> | -2.21                 | 3.79                |

**Table S4-** DEGs predicted to encode enzymes engaged in sugar metabolism. Fold changes show in bold are statistically significant (FDR≤0.05) changed more than two times. Empty fold change cells are representative of not expressed gene in both compared strains.

| Gene ID              | Bincode Name                                                          | Best annotation                                                                                | Fold Change      |                                 |                               |                   |                                  |                                |
|----------------------|-----------------------------------------------------------------------|------------------------------------------------------------------------------------------------|------------------|---------------------------------|-------------------------------|-------------------|----------------------------------|--------------------------------|
|                      |                                                                       |                                                                                                | S<br>WT-<br>(E-) | S<br>Δ <sub>ve</sub> A-<br>(E-) | S<br>Δ <sub>ve</sub> A/<br>WT | IP<br>WT-<br>(E-) | IP<br>Δ <sub>ve</sub> A/<br>(E-) | IP<br>Δ <sub>ve</sub> A/<br>WT |
| 8128 ref0015167-0.0  | 'major CHO metabolism<br>synthesis sucrose (SPS)'                     | Sucrose phosphate<br>synthase 1<br>[ <i>Arabidopsis thaliana</i> ]                             |                  |                                 |                               | <b>-8.72</b>      | -1.56                            | <b>5.57</b>                    |
| 5904 ref0034294-0.1  | 'major CHO metabolism<br>synthesis sucrose (SPS)'                     | Sucrose-6-phosphate<br>phosphohydrolase<br>[ <i>Hordeum vulgare</i><br>subsp. <i>vulgare</i> ] | 1.17             | <b>2.17</b>                     | 1.85                          | -2.05             | 1.10                             | 2.26                           |
| 12649 ref0035145-0.0 | 'major CHO metabolism<br>degradation sucrose hexokinase'              | hexokinase-7<br>[ <i>Brachypodium distachyon</i> ]                                             | -2.02            | 1.29                            | <b>2.62</b>                   | 1.13              | -1.37                            | -1.55                          |
| 5327 ref0035434-0.0  | 'major CHO metabolism<br>degradation sucrose invertases<br>cell wall' | fructan exohydrolase<br>[ <i>Phleum pratense</i> ]                                             | -1.77            | -1.03                           | 1.72                          | <b>6.61</b>       | -1.10                            | <b>-7.30</b>                   |
| 731 ref0019652-0.3   | 'major CHO metabolism<br>degradation sucrose invertases<br>cell wall' | fructan exohydrolase<br>[ <i>Phleum pratense</i> ]                                             | -1.70            | 1.26                            | <b>2.14</b>                   |                   |                                  |                                |
| 406 ref0021378-0.3   | 'major CHO metabolism<br>degradation sucrose invertases<br>cell wall' | cell wall invertase<br>[ <i>Lolium perenne</i> ]                                               | -1.29            | 1.56                            | <b>2.01</b>                   | -2.38             | 1.15                             | 2.73                           |
| 9463 ref0034934-0.0  | 'major CHO metabolism<br>degradation sucrose invertases<br>cell wall' | cell wall invertase<br>[ <i>Triticum aestivum</i> ]                                            | 1.27             | <b>2.44</b>                     | 1.93                          | -1.99             | -1.03                            | 1.94                           |
| 1673 ref0036117-0.0  | 'major CHO metabolism<br>degradation sucrose invertases<br>vacuolar'  | fructosyltransferase-<br>like protein [Lolium<br><i>perenne</i> ]                              | -1.95            | -1.62                           | 1.21                          | <b>-9.06</b>      | <b>-17.12</b>                    | -1.89                          |
| 671 ref0020303-0.0   | 'major CHO metabolism<br>degradation sucrose invertases<br>vacuolar'  | putative<br>fructosyltransferase1<br>[ <i>Lolium perenne</i> ]                                 | 1.74             | -1.02                           | -1.76                         | -2.13             | 2.75                             | <b>5.88</b>                    |
| 6955 ref0011933-0.0  | 'transport sugars sucrose'                                            | Sucrose transport<br>protein SUT5<br>[ <i>Triticum urartu</i> ]                                | <b>2.27</b>      | -1.08                           | <b>-2.47</b>                  | 1.04              | -1.16                            | -1.21                          |
| 13424 ref0032032-0.0 | 'transport.sugars'                                                    | PREDICTED: sugar<br>transport protein 13<br>[ <i>Setaria italica</i> ]                         | 1.04             | 1.10                            | 1.06                          | 1.97              | <b>5.62</b>                      | 2.85                           |
| 245 ref0012158-1.0   | 'transport.sugars'                                                    | hexose transporter<br>[ <i>Oryza sativa</i><br>Japonica Group]                                 | -1.16            | -1.01                           | 1.15                          | <b>16.68</b>      | <b>14.04</b>                     | -1.18                          |
| 13641 ref0014757-0.0 | 'transport.sugars'                                                    | Sugar carrier protein<br>C [Triticum urartu]                                                   | -1.00            | <b>2.04</b>                     | <b>2.05</b>                   | 1.65              | 1.06                             | -1.55                          |
| 18487 ref0015440-0.0 | 'transport.sugars'                                                    | sugar transport<br>protein 5-like isoform<br>X1 [Brachypodium<br><i>distachyon</i> ]           | <b>-2.30</b>     | -1.03                           | <b>2.24</b>                   | 1.40              | 4.58                             | 3.27                           |
| 5190 ref0021123-0.3  | 'transport.sugars'                                                    | predicted protein<br>[ <i>Hordeum vulgare</i><br>subsp. <i>vulgare</i> ]                       | -2.02            | 1.54                            | <b>3.12</b>                   | -3.15             | -2.02                            | 1.56                           |
| 6199 ref0042523-0.0  | 'transport.sugars'                                                    | predicted protein<br>[ <i>Hordeum vulgare</i><br>subsp. <i>vulgare</i> ]                       | -2.02            | 1.26                            | <b>2.54</b>                   | -1.93             | 1.07                             | 2.07                           |
| 8121 ref0015158-0.0  | 'transport.sugars'                                                    | sugar transport<br>protein 14<br>[Brachypodium<br><i>distachyon</i> ]                          | -1.81            | 1.34                            | <b>2.42</b>                   | -1.60             | -1.19                            | 1.34                           |
| 8522 ref0019595-0.1  | 'transport.sugars'                                                    | Sugar transport<br>protein 13 [Aegilops<br><i>tauschii</i> ]                                   | -1.76            | 1.18                            | <b>2.08</b>                   | -2.26             | -1.06                            | 2.13                           |
| 8701 ref0036885-0.0  | 'transport.sugars'                                                    | MFS transporter<br>[ <i>Hordeum vulgare</i><br>subsp. <i>vulgare</i> ]                         | -1.36            | 1.84                            | <b>2.51</b>                   | -2.38             | -1.55                            | 1.54                           |

**Table S5-** DEGs predicted to encode enzymes engaged in photosynthesis. Fold changes show in bold are statistically significant (FDR≤0.05) changed more than two times. Empty fold change cells are representative of not expressed gene in both compared strains.

| Gene ID           | Bincode Name                                                 | Best annotation                                                           | Fold Change      |                              |                            |                   |                               |                             |
|-------------------|--------------------------------------------------------------|---------------------------------------------------------------------------|------------------|------------------------------|----------------------------|-------------------|-------------------------------|-----------------------------|
|                   |                                                              |                                                                           | S<br>WT-<br>(E-) | S<br>Δ <i>veIA</i> -<br>(E-) | S<br>Δ <i>veIA</i> -<br>WT | IP<br>WT-<br>(E-) | IP<br>Δ <i>veIA</i> -<br>(E-) | IP<br>Δ <i>veIA</i> -<br>WT |
| 3163 0009846-0.1  | 'PS light reaction photosystem I LHC-I'                      | photosystem I light harvesting complex gene 2                             | -1.93            | 1.04                         | <b>2.01</b>                | 2.00              | 1.05                          | -1.90                       |
| 7424 0044379-0.1  | 'PS light reaction photosystem I LHC-I'                      | photosystem I light harvesting complex gene 2                             | <b>-2.28</b>     | -1.35                        | 1.68                       | 1.38              | 1.03                          | -1.34                       |
| 1452 0003114-0.3  | 'PS light reaction photosystem II LHC-II'                    | Chlorophyll a-b binding protein 1B, chloroplastic [Aegilops tauschii]     | <b>-3.74</b>     | -1.22                        | <b>3.07</b>                | 2.43              | 1.59                          | -1.53                       |
| 1452 0003114-0.5  | 'PS light reaction photosystem II LHC-II'                    | Chlorophyll a-b binding protein 1B, chloroplastic [Aegilops tauschii]     | -2.55            | 1.18                         | <b>3.01</b>                | <b>22.27</b>      | <b>5.37</b>                   | -4.14                       |
| 1998 0021188-0.0  | 'PS light reaction photosystem II LHC-II'                    | chlorophyll a-b binding protein, chloroplastic [Brachypodium distachyon]  | <b>-2.16</b>     | -1.20                        | 1.80                       | 1.52              | 1.25                          | -1.22                       |
| 228 0023193-1.3   | 'PS light reaction photosystem II LHC-II'                    | chlorophyll a-b binding protein of LHCII type 1 [Brachypodium distachyon] | -1.98            | 1.12                         | <b>2.23</b>                | 2.27              | 1.74                          | -1.31                       |
| 399 0000946-0.5   | 'PS light reaction photosystem II LHC-II'                    | Chlorophyll a-b binding protein CP26, chloroplastic [Aegilops tauschii]   | <b>-2.22</b>     | -1.21                        | 1.83                       | 1.64              | 1.25                          | -1.32                       |
| 7637 0001662-0.1  | 'PS light reaction photosystem II PSII polypeptide subunits' | Photosystem II 1 kDa polypeptide, chloroplast [Salmo salar]               | -1.70            | -1.46                        | 1.17                       | 1.78              | <b>-5.60</b>                  | <b>-9.95</b>                |
| 7637 0001662-0.2  | 'PS light reaction photosystem II PSII polypeptide subunits' | Photosystem II 1 kDa polypeptide, chloroplastic [Aegilops tauschii]       | -1.92            | -1.32                        | 1.46                       | <b>5.46</b>       | -4.65                         | <b>-25.44</b>               |
| 21159 0002244-0.0 | 'PS light reaction state transition'                         | unnamed protein product [Triticum aestivum]                               |                  |                              |                            | -1.00             | <b>-8.87</b>                  | <b>-8.83</b>                |
| 22186 0033836-0.0 | 'PS light reaction state transition'                         | putative vesicle associated membrane protein [Triticum aestivum]          | <b>2.97</b>      | 2.29                         | -1.30                      | -2.87             | -1.96                         | 1.47                        |
| 4713 0037794-0.0  | 'PS light reaction state transition'                         | myosin-15-like isoform X1 [Brachypodium distachyon]                       | 1.21             | 1.05                         | -1.15                      | <b>-18.29</b>     | <b>-27.73</b>                 | -1.52                       |



**Table S6-** DEGs predicted to encode enzymes associated in plant and fungal cell wall. Fold changes show in bold are statistically significant (FDR≤0.05) changed more than two times. Empty fold change cells are representative of not expressed gene in both compared strains.

| Gene ID           | Bincode Name                                                  | Best annotation                                              | Fold change  |                           |                         |               |                            |                          |
|-------------------|---------------------------------------------------------------|--------------------------------------------------------------|--------------|---------------------------|-------------------------|---------------|----------------------------|--------------------------|
|                   |                                                               |                                                              | S WT-(E-)    | S Δ <sup>velA</sup> -(E-) | S Δ <sup>velA</sup> -WT | IP WT-(E-)    | IP Δ <sup>velA</sup> -(E-) | IP Δ <sup>velA</sup> -WT |
| 10004 0012901-0.0 | 'cell wall.cellulose synthesis.cellulose synthase'            | cellulose synthase-like D3 [Arabidopsis thaliana]            |              |                           |                         | <b>-12.18</b> | -2.43                      | <b>5.05</b>              |
| 12401 0030411-0.0 | 'cell wall.cellulose synthesis.cellulose synthase'            | cellulose synthase-like D3 [Arabidopsis thaliana]            | 1.25         | 1.46                      | 1.15                    | -1.63         | <b>-12.32</b>              | <b>-7.67</b>             |
| 1704 0031283-0.0  | 'cell wall.cellulose synthesis.cellulose synthase'            | cellulose synthase like G2 [Arabidopsis thaliana]            | -1.48        | <b>-4.18</b>              | <b>-2.73</b>            |               |                            |                          |
| 2515 0039698-0.1  | 'cell wall.cellulose synthesis.COBRA'                         | predicted protein [Hordeum vulgare subsp. vulgare]           | 1.59         | <b>3.46</b>               | <b>2.05</b>             | -1.83         | 1.10                       | 2.04                     |
| 246 0012161-0.1   | 'cell wall.cellulose synthesis'                               | hypothetical protein F775_1266 [Aegilops tauschii]           | <b>-2.54</b> | <b>-4.38</b>              | -1.74                   |               |                            |                          |
| 6792 0008466-0.0  | 'cell wall.hemicellulose synthesis.glucuronoxylan'            | hypothetical protein F775_1266 [Aegilops tauschii]           | 2.44         | <b>4.00</b>               | 1.81                    | -1.34         | -1.23                      | 1.03                     |
| 2462 0011551-0.0  | 'cell wall.degradation.mannan-xylose-arabinose-fucose'        | predicted protein [Hordeum vulgare subsp. vulgare]           | <b>2.62</b>  | <b>2.49</b>               | -1                      |               |                            |                          |
| 5328 0035447-0.0  | 'cell wall.degradation.mannan-xylose-arabinose-fucose'        | xyloglucan xyloglucosyl transferase [Hordeum vulgare]        | -1.64        | -1.07                     | 1.54                    | <b>5.24</b>   | <b>11.63</b>               | 2.23                     |
| 5359 0042439-0.0  | 'cell wall.degradation.mannan-xylose-arabinose-fucose'        | mannan endo-1,4-beta-mannosidase 1 [Brachypodium distachyon] | 1.53         | -1.29                     | -1.97                   | <b>-14.22</b> | 1.42                       | <b>20.39</b>             |
| 634 0045342-0.5   | 'cell wall.degradation.pectate lyases and polygalacturonases' | hypothetical protein ZEAMMB73_269375 [Zea mays]              | 2.01         | <b>2.46</b>               | 1.2                     |               |                            |                          |
| 16353 0013246-0.0 | 'cell wall.modification'                                      | expansin B4 [Arabidopsis thaliana]                           | 1.85         | -1.18                     | <b>-2.17</b>            | -2.22         | <b>-10.25</b>              | <b>-4.98</b>             |
| 10034 0030944-0.0 | 'cell wall.modification'                                      | expansin A15 [Arabidopsis thaliana]                          | -1.07        | <b>-2.65</b>              | <b>-2.48</b>            |               |                            |                          |
| 5014 0044908-0.1  | 'cell wall.modification'                                      | expansin A1 [Arabidopsis thaliana]                           | 1.48         | <b>2.19</b>               | 1.47                    |               |                            |                          |
| 1899 0018801-0.0  | 'cell wall.modification'                                      | expansin-A21-like [Brachypodium distachyon]                  | <b>2.11</b>  | 1.15                      | -1.84                   |               |                            |                          |
| 1776 0013307-0.1  | 'cell wall.modification'                                      | xyloglucan endotransglucosylase [Arabidopsis thaliana]       | 1.62         | 1.13                      | -1.43                   | 1.92          | -3.11                      | <b>-5.84</b>             |
| 2451 0017008-0.0  | 'cell wall.modification'                                      | xyloglucan endotransglucosylase [Hordeum vulgare]            | -1.35        | 1.82                      | <b>2.47</b>             | 2.24          | -2.22                      | <b>-4.93</b>             |
| 4019 0041942-0.5  | 'cell wall.pectin*esterases.acetyl esterase'                  | Pectinacetyl esterase family protein [Arabidopsis thaliana]  | <b>-2.39</b> | 1.34                      | <b>3.19</b>             | 1.24          | 1.74                       | 1.42                     |

**Table S7-** DEGs encode proteins involved in secondary metabolites biosynthesis. Fold changes show in bold are statistically significant (FDR≤0.05) changed more than two times. Empty fold change cells are representative of not expressed gene in both compared strains.

| Gene ID          | Bincode Name                                                           | Best annotation                                            | Fold Change  |                      |                    |            |                       |                     |
|------------------|------------------------------------------------------------------------|------------------------------------------------------------|--------------|----------------------|--------------------|------------|-----------------------|---------------------|
|                  |                                                                        |                                                            | S WT-(E-)    | S $\Delta$ veIA-(E-) | S $\Delta$ veIA-WT | IP WT-(E-) | IP $\Delta$ veIA-(E-) | IP $\Delta$ veIA-WT |
| 1716 0000676-0.6 | secondary<br>metabolism.phenylpropanoids.lignin<br>biosynthesis.4CL'   | OPC-8:0 CoA ligase1                                        | <b>2.25</b>  | <b>3.36</b>          | 1.49               | 1.07       | 1.81                  | 1.69                |
| 0 0040988-3.1    | 'secondary<br>metabolism.phenylpropanoids.lignin<br>biosynthesis.C4H'  | cytochrome P450, family 98, subfamily A,<br>polypeptide 3  | -1.38        | <b>-2.33</b>         | -1.69              |            |                       |                     |
| 2479 0029533-0.1 | 'secondary<br>metabolism.phenylpropanoids.lignin<br>biosynthesis.C4H'  | cytochrome P450, family 98, subfamily A,<br>polypeptide 3  | <b>10.55</b> | <b>51.80</b>         | <b>4.93</b>        |            |                       |                     |
| 2324 0036197-0.0 | 'secondary<br>metabolism.phenylpropanoids.lignin<br>biosynthesis.CCR1' | cinnamoyl coa reductase                                    | 1.80         | 1.07                 | -1.68              | 2.24       | <b>205.67</b>         | <b>463.97</b>       |
| 4219 0035898-0.0 | secondary<br>metabolism.phenylpropanoids.lignin<br>biosynthesis.CCR1'  | NAD(P)-binding Rossmann-fold superfamily<br>protein        | <b>-3.89</b> | -1.11                | <b>3.52</b>        | 2.84       | 2.66                  | -1.07               |
| 4368 0002962-0.0 | 'secondary<br>metabolism.phenylpropanoids.lignin<br>biosynthesis.F5H'  | cytochrome P450, family 71, subfamily B,<br>polypeptide 34 | <b>2.55</b>  | <b>4.82</b>          | 1.89               | -1.70      | 1.51                  | 2.57                |
| 529 0042161-0.3  | secondary<br>metabolism.phenylpropanoids.lignin<br>biosynthesis.F5H'   | Cytochrome P450 superfamily protein                        | <b>-2.29</b> | -1.05                | <b>2.18</b>        | -1.28      | 4.49                  | <b>5.73</b>         |
| 5292 0013391-0.0 | 'secondary<br>metabolism.phenylpropanoids.lignin<br>biosynthesis.F5H'  | cytochrome P450, family 71, subfamily B,<br>polypeptide 34 | 1.52         | <b>2.74</b>          | 1.80               | -1.35      | 1.37                  | 1.86                |
| 4885 0034746-0.0 | secondary<br>metabolism.phenylpropanoids.lignin<br>biosynthesis.HCT'   | HXXXD-type acyl-transferase family protein                 | 2.02         | <b>2.59</b>          | 1.28               |            |                       |                     |
| 7436 0026562-0.0 | 'secondary<br>metabolism.phenylpropanoids.lignin<br>biosynthesis.HCT'  | HXXXD-type acyl-transferase family protein                 | -1.19        | <b>3.41</b>          | <b>4.04</b>        |            |                       |                     |

|                       |                                                                                       |                                                                            |              |              |              |              |               |               |
|-----------------------|---------------------------------------------------------------------------------------|----------------------------------------------------------------------------|--------------|--------------|--------------|--------------|---------------|---------------|
| 3264 0023028-0.0      | 'secondary<br>metabolism.phenylpropanoids.lignin<br>biosynthesis.PAL'                 | phenylalanine ammonia-lyase 2                                              | 1.10         | <b>2.58</b>  | <b>2.35</b>  | <b>-6.60</b> | -2.50         | 2.64          |
| 3264 0023028-0.1      | 'secondary<br>metabolism.phenylpropanoids.lignin<br>biosynthesis.PAL'                 | phenylalanine ammonia-lyase 2                                              | <b>2.34</b>  | <b>2.76</b>  | 1.18         | <b>-4.97</b> | -2.84         | 1.75          |
| 1105 0016983-0.7      | 'secondary<br>metabolism.isoprenoids.terpenoids'                                      | Terpenoid cyclases/Protein<br>prenyltransferases superfamily protein       | 1.02         | <b>-2.62</b> | <b>-2.66</b> |              |               |               |
| 15392 0002671-<br>0.0 | 'secondary<br>metabolism.isoprenoids.terpenoids'                                      | terpene synthase-like sequence-1,8-cineole                                 |              |              |              | <b>13.51</b> | <b>7.34</b>   | -1.84         |
| 2163 0015757-0.0      | 'secondary<br>metabolism.isoprenoids.terpenoids'                                      | Terpenoid cyclases/Protein<br>prenyltransferases superfamily protein       | 1.64         | <b>2.14</b>  | 1.30         |              |               |               |
| 3397 0039783-0.5      | 'secondary<br>metabolism.isoprenoids.terpenoids'                                      | terpene synthase-like sequence-1,8-cineole                                 |              |              |              | -2.94        | <b>-5.83</b>  | -1.98         |
| 408 0021371-0.2       | 'secondary<br>metabolism.isoprenoids.terpenoids'                                      | Terpenoid cyclases/Protein<br>prenyltransferases superfamily protein       | -1.83        | 1.51         | <b>2.76</b>  | <b>-5.37</b> | -2.06         | 2.61          |
| 529 0042161-0.1       | 'secondary<br>metabolism.isoprenoids.terpenoids'                                      | terpene synthase-like sequence-1,8-cineole                                 | -1.84        | <b>15.05</b> | <b>27.66</b> | -1.31        | <b>-88.26</b> | <b>-67.71</b> |
| 15239 0044829-<br>0.0 | secondary<br>metabolism.flavonoids.anthocyanins.anthocy<br>anidin reductase'          | dihydroflavonol 4-reductase                                                | <b>2.34</b>  | <b>2.52</b>  | 1.08         | -1.93        | -1.74         | 1.11          |
| 2994 0021678-0.1      | 'secondary<br>metabolism.flavonoids.anthocyanins.anthocy<br>anidin reductase'         | dihydroflavonol 4-reductase                                                | -1.72        | 1.03         | 1.77         | 1.46         | <b>-7.80</b>  | <b>-11.39</b> |
| 5717 0000643-0.0      | 'secondary<br>metabolism.flavonoids.anthocyanins'                                     | 2-oxoglutarate (2OG) and Fe(II)-dependent<br>oxygenase superfamily protein | -1.13        | <b>3.58</b>  | <b>4.06</b>  | -2.55        | <b>-5.23</b>  | -2.05         |
| 16995 0020958-<br>0.0 | 'secondary<br>metabolism.flavonoids.chalcones.naringenin-<br>chalcone synthase'       | Chalcone and stilbene synthase family<br>protein                           | 1.17         | -1.51        | -1.77        | <b>-4.84</b> | 2.13          | <b>10.29</b>  |
| 2884 0002567-0.0      | 'secondary metabolism.flavonoids.chalcones'                                           | Chalcone and stilbene synthase family<br>protein                           | 1.85         | <b>38.23</b> | <b>20.71</b> |              |               |               |
| 8997 0019391-0.0      | 'secondary<br>metabolism.flavonoids.dihydroflavonols.dihyd<br>roflavonol 4-reductase' | NAD(P)-binding Rossmann-fold superfamily<br>protein                        | -1.68        | <b>-4.28</b> | <b>-2.55</b> |              |               |               |
| 10510 0001618-<br>0.0 | 'secondary<br>metabolism.flavonoids.dihydroflavonols.flavon<br>oid 3''-monooxygenase' | cytochrome P450, family 71, subfamily A,<br>polypeptide 15                 | <b>-2.55</b> | 1.02         | <b>2.61</b>  | 1.15         | -1.36         | -1.56         |
| 11445 0015996-<br>0.0 | secondary<br>metabolism.flavonoids.dihydroflavonols.flavon<br>oid 3''-monooxygenase'  | cytochrome P450, family 71 subfamily B,<br>polypeptide 7                   | -1.66        | <b>-2.12</b> | -1.28        | -1.12        | 1.53          | 1.72          |

|                   |                                                                                   |                                                                         |              |              |              |               |               |             |
|-------------------|-----------------------------------------------------------------------------------|-------------------------------------------------------------------------|--------------|--------------|--------------|---------------|---------------|-------------|
| 11649 0038902-0.1 | 'secondary<br>metabolism.flavonoids.dihydroflavonols.flavonoid 3''-monooxygenase' | cytochrome P450, family 706, subfamily A, polypeptide 6                 | <b>-2.23</b> | -1.38        | 1.62         | 1.59          | 1.50          | -1.06       |
| 15453 0008137-0.1 | 'secondary<br>metabolism.flavonoids.dihydroflavonols.flavonoid 3''-monooxygenase' | cytochrome P450, family 71, subfamily B, polypeptide 35                 | 1.18         | <b>-2.37</b> | <b>-2.80</b> | <b>7.02</b>   | <b>17.80</b>  | 2.54        |
| 4211 0043078-0.0  | 'secondary<br>metabolism.flavonoids.dihydroflavonols.flavonoid 3''-monooxygenase' | cytochrome P450, family 706, subfamily A, polypeptide 6                 | 1.27         | <b>-2.26</b> | <b>-2.86</b> |               |               |             |
| 4396 0019374-0.0  | 'secondary<br>metabolism.flavonoids.dihydroflavonols.flavonoid 3''-monooxygenase' | cytochrome P450, family 706, subfamily A, polypeptide 6                 | 1.53         | <b>5.65</b>  | <b>3.68</b>  | -3.73         | -1.80         | 2.07        |
| 4481 0040498-0.1  | 'secondary<br>metabolism.flavonoids.dihydroflavonols.flavonoid 3''-monooxygenase' | cytochrome P450, family 706, subfamily A, polypeptide 6                 | 1.15         | <b>6.19</b>  | <b>5.37</b>  | <b>-5.74</b>  | -2.10         | 2.73        |
| 4481 0040498-0.3  | 'secondary<br>metabolism.flavonoids.dihydroflavonols.flavonoid 3''-monooxygenase' | cytochrome P450, family 706, subfamily A, polypeptide 6                 | 1.46         | <b>5.27</b>  | <b>3.62</b>  | -3.45         | -1.20         | 2.89        |
| 6356 0041246-0.0  | 'secondary<br>metabolism.flavonoids.dihydroflavonols.flavonoid 3''-monooxygenase' | cytochrome P450, family 71, subfamily B, polypeptide 35                 | -1.34        | -1.91        | -1.42        | 3.84          | <b>12.61</b>  | 3.28        |
| 6412 0039669-0.0  | 'secondary<br>metabolism.flavonoids.dihydroflavonols.flavonoid 3''-monooxygenase' | cytochrome P450, family 712, subfamily A, polypeptide 1                 | 1.56         | -1.63        | <b>-2.54</b> | -2.36         | -1.40         | 1.69        |
| 6509 0006070-0.0  | 'secondary<br>metabolism.flavonoids.dihydroflavonols.flavonoid 3''-monooxygenase' | cytochrome P450, family 706, subfamily A, polypeptide 6                 | <b>-2.13</b> | -1.95        | 1.09         | 1.29          | 2.07          | 1.60        |
| 8705 0036889-0.0  | 'secondary<br>metabolism.flavonoids.dihydroflavonols.flavonoid 3''-monooxygenase' | cytochrome P450, family 71, subfamily B, polypeptide 37                 | 1.10         | -1.25        | -1.38        | <b>-13.21</b> | <b>-4.81</b>  | 2.74        |
| 185 0000330-1.0   | 'secondary<br>metabolism.flavonoids.dihydroflavonols'                             | 2-oxoglutarate (2OG) and Fe(II)-dependent oxygenase superfamily protein | 1.89         | <b>6.05</b>  | <b>3.19</b>  | -3.51         | 1.34          | <b>4.69</b> |
| 185 0000330-1.1   | 'secondary<br>metabolism.flavonoids.dihydroflavonols'                             | 2-oxoglutarate (2OG) and Fe(II)-dependent oxygenase superfamily protein | -1.92        | 1.33         | <b>2.55</b>  | <b>-5.54</b>  | <b>-11.61</b> | -2.10       |
| 2542 0011927-0.0  | 'secondary<br>metabolism.flavonoids.dihydroflavonols'                             | 2-oxoglutarate (2OG) and Fe(II)-dependent oxygenase superfamily protein | -1.18        | <b>2.53</b>  | <b>3.00</b>  | -1.23         | -1.35         | -1.09       |
| 18564 0016146-0.0 | 'secondary metabolism.flavonoids.flavonols'                                       | 2-oxoglutarate (2OG) and Fe(II)-dependent oxygenase superfamily protein | 1.06         | 1.24         | 1.16         | -4.21         | 1.20          | <b>5.07</b> |
| 4527 0038439-0.0  | 'secondary metabolism.flavonoids.flavonols'                                       | 2-oxoglutarate (2OG) and Fe(II)-dependent oxygenase superfamily protein | 1.89         | <b>2.80</b>  | 1.48         | -1.98         | 1.01          | 2.01        |

|                        |                                                                                                                   |                                                             |              |              |              |              |             |             |  |
|------------------------|-------------------------------------------------------------------------------------------------------------------|-------------------------------------------------------------|--------------|--------------|--------------|--------------|-------------|-------------|--|
| 14366 0045001-0.0      | 'secondary metabolism.flavonoids.isoflavones.isoflavone reductase'                                                | NmrA-like negative transcriptional regulator family protein | -1.98        | 1.04         | <b>2.06</b>  |              |             |             |  |
| 12006 0041597-0.0      | 'secondary metabolism.isoprenoids.carotenoids.carotenoid beta ring hydroxylase'                                   | beta-carotene hydroxylase 2                                 | 1.19         | 1.28         | 1.07         | 1.07         | <b>5.75</b> | <b>5.40</b> |  |
| 6708 0024836-0.0       | 'secondary metabolism.isoprenoids.non-mevalonate pathway.DXS'                                                     | 1-deoxy-D-xylulose 5-phosphate synthase 1                   | <b>2.40</b>  | <b>4.49</b>  | 1.87         | -2.22        | 1.03        | 2.29        |  |
| snap_4308 0038962-0.15 | 'secondary metabolism.N misc.alkaloid-like'                                                                       | FAD-binding Berberine family protein                        | 1.33         | 1.57         | 1.18         | <b>-5.29</b> | 1.49        | <b>7.88</b> |  |
| snap_4308 0038962-0.8  | 'secondary metabolism.N misc.alkaloid-like'                                                                       | FAD-binding Berberine family protein                        | 1.59         | <b>3.13</b>  | 1.97         |              |             |             |  |
| 133 0020071-1.2        | 'secondary metabolism.phenylpropanoids'                                                                           | O-methyltransferase family protein                          | 1.24         | <b>2.28</b>  | 1.83         |              |             |             |  |
| 160 0012850-0.0        | 'secondary metabolism.phenylpropanoids'                                                                           | HXXXD-type acyl-transferase family protein                  | 1.25         | -1.93        | <b>-2.41</b> |              |             |             |  |
| 1770 0013301-0.0       | 'secondary metabolism.simple phenols'                                                                             | laccase 12                                                  | <b>-2.61</b> | <b>-6.04</b> | <b>-2.31</b> |              |             |             |  |
| 1770 0013301-0.1       | 'secondary metabolism.simple phenols'                                                                             | laccase 12                                                  | -1.65        | <b>-2.29</b> | -1.39        |              |             |             |  |
| 5878 0040205-0.0       | 'secondary metabolism.sulfur-containing.glucosinolates.degradation.myrosinase'                                    | beta glucosidase 15                                         | 1.50         | -1.46        | <b>-2.20</b> |              |             |             |  |
| 8235 0022638-0.0       | 'secondary metabolism.sulfur-containing.glucosinolates.synthesis.shared.CYP83B1 phenylacetaldoxime monooxygenase' | cytochrome P450, family 71, subfamily B, polypeptide 20     | 1.99         | <b>2.99</b>  | 1.51         | -1.94        | -1.08       | 1.80        |  |
| 4851 0029305-0.4       | 'secondary metabolism.wax'                                                                                        | beta-ketoacyl reductase 2                                   | 1.81         | <b>2.94</b>  | 1.62         |              |             |             |  |
| 6296 0018632-0.0       | 'secondary metabolism.wax'                                                                                        | Fatty acid hydroxylase superfamily                          | -1.57        | 1.54         | <b>2.43</b>  | -1.16        | 2.16        | 2.50        |  |
| 7855 0036148-0.1       | 'secondary metabolism.wax'                                                                                        | beta-ketoacyl reductase 1                                   | 1.14         | <b>-3.01</b> | <b>-3.43</b> |              |             |             |  |

**Table S8-** DEGs encode proteins involved in abiotic stresses. Fold changes show in bold are statistically significant (FDR≤0.05) changed more than two times. Empty fold change cells are representative of not expressed gene in both compared strains.

| Gene ID           | Bincode Name                    | Best annotation                                              | Fold Change |                      |                    |            |                       |                     |
|-------------------|---------------------------------|--------------------------------------------------------------|-------------|----------------------|--------------------|------------|-----------------------|---------------------|
|                   |                                 |                                                              | S WT-(E-)   | S $\Delta$ veIA-(E-) | S $\Delta$ veIA-WT | IP WT-(E-) | IP $\Delta$ veIA-(E-) | IP $\Delta$ veIA-WT |
| 16888 0036561-0.0 | 'stress.abiotic.cold'           | Peroxidase superfamily protein                               | -1.02       | 1.17                 | 1.20               | 1.70       | -5.08                 | -8.62               |
| 27094 0033264-0.0 | 'stress.abiotic.cold'           | Peroxidase superfamily protein                               | -2.45       | -516.21              | -221.92            |            |                       |                     |
| 3783 0029599-0.2  | 'stress.abiotic.cold'           | Peroxidase superfamily protein                               | 1.09        | -5.11                | -5.58              |            |                       |                     |
| 7468 0021099-0.0  | 'stress.abiotic.drought/salt'   | ERD (early-responsive to dehydration stress) family protein  | 1.35        | 1.21                 | -1.11              | -2.29      | 12.34                 | 28.26               |
| 11003 0019732-0.0 | 'stress.abiotic.heat'           | HSP20-like chaperones superfamily protein                    | 2.05        | -1.07                | -2.20              |            |                       |                     |
| 15044 0029114-0.0 | 'stress.abiotic.heat'           | Chaperone DnaJ-domain superfamily protein                    | 2.33        | -1.04                | -2.43              | -1.46      | -1.85                 | -1.27               |
| 1856 0042057-0.0  | 'stress.abiotic.heat'           | DNAJ heat shock N-terminal domain-containing protein         | 1.33        | -1.03                | -1.36              | 1.59       | 6.10                  | 3.85                |
| 4444 0017402-0.2  | 'stress.abiotic.heat'           | DNAJ heat shock N-terminal domain-containing protein         | -2.62       | -1.41                | 1.86               | 2.08       | 2.55                  | 1.23                |
| 5674 0034274-0.1  | 'stress.abiotic.heat'           | heat shock transcription factor A2                           | -1.57       | -2.30                | -1.46              | 4.32       | 6.18                  | 1.43                |
| 6225 0038301-0.0  | 'stress.abiotic.heat'           | Chaperone DnaJ-domain superfamily protein                    | -3.34       | -2.31                | 1.45               | 3.88       | -3.80                 | -14.74              |
| 679 0020295-0.0   | 'stress.abiotic.heat'           | winged-helix DNA-binding transcription factor family protein | 1.03        | 2.16                 | 2.09               | -1.71      | -1.06                 | 1.61                |
| 1235 0015297-0.2  | 'stress.abiotic.touch/wounding' | Wound-responsive family protein                              | -1.71       | 2.10                 | 3.34               | 1.20       | -1.63                 | -1.96               |
| 10578 0037683-0.0 | 'stress.abiotic.unspecified'    | RmlC-like cupins superfamily protein                         | 2.25        | 4.04                 | 1.80               | -1.16      | -2.13                 | -1.84               |
| 13475 0026757-0.1 | 'stress.abiotic.unspecified'    | unknown protein                                              | -16.04      | 1.07                 | 17.06              |            |                       |                     |
| 1655 0023677-0.0  | 'stress.abiotic.unspecified'    | RmlC-like cupins superfamily protein                         | 2.27        | 2.37                 | 1.05               |            |                       |                     |
| 2106 0029322-0.1  | 'stress.abiotic.unspecified'    | RmlC-like cupins superfamily protein                         | 1.11        | -1.11                | -1.23              | 10.38      | 6.16                  | -1.69               |

|                   |                              |                                      |       |       |       |       |      |      |
|-------------------|------------------------------|--------------------------------------|-------|-------|-------|-------|------|------|
| 557 0013553-0.2   | 'stress.abiotic.unspecified' | RmlC-like cupins superfamily protein | 1.46  | 2.40  | 1.64  |       |      |      |
| 557 0013553-0.5   | 'stress.abiotic.unspecified' | RmlC-like cupins superfamily protein | 1.54  | 2.73  | 1.77  |       |      |      |
| 6807 0019838-0.4  | 'stress.abiotic.unspecified' | RmlC-like cupins superfamily protein | -1.21 | 1.86  | 2.26  |       |      |      |
| 10085 0011254-0.0 | 'stress.abiotic'             | SPX domain gene 1                    | 1.23  | -1.67 | -2.06 | -1.39 | 1.07 | 1.49 |

**Table S9-** DEGs encode proteins involved in biotic stresses. Fold changes show in bold are statistically significant (FDR≤0.05) changed more than two times. Empty fold change cells are representative of not expressed gene in both compared strains.

| Gene ID                | Bincode Name                        | Best annotation                                                                                           | Fold Change |                      |                    |              |                       |                     |
|------------------------|-------------------------------------|-----------------------------------------------------------------------------------------------------------|-------------|----------------------|--------------------|--------------|-----------------------|---------------------|
|                        |                                     |                                                                                                           | S WT-(E-)   | S $\Delta$ veIA-(E-) | S $\Delta$ veIA-WT | IP WT-(E-)   | IP $\Delta$ veIA-(E-) | IP $\Delta$ veIA-WT |
| 13893 0007097-0.0      | 'not assigned.unknown'              | Pathogenesis-related protein Bet v                                                                        | 1.07        | 1.20                 | 1.12               | -2.89        | <b>-8.95</b>          | -3.10               |
| snap_1310 0005233-0.18 | 'stress.biotic'                     | basic pathogenesis-related protein 1                                                                      | -1.04       | <b>2.29</b>          | <b>2.38</b>        |              |                       |                     |
| snap_367 0009954-0.1   | 'stress.biotic'                     | CAP (Cysteine-rich secretory proteins, Antigen 5, and Pathogenesis-related 1 protein) superfamily protein | 1.51        | <b>3.14</b>          | 2.08               |              |                       |                     |
| snap_18280 0002333-0.0 | 'stress.biotic'                     | basic pathogenesis-related protein 1                                                                      | <b>2.44</b> | <b>5.02</b>          | <b>2.06</b>        | 2.53         | 1.03                  | -2.47               |
| snap_27036 0021856-0.0 | 'stress.biotic'                     | basic pathogenesis-related protein 1                                                                      | 1.39        | <b>2.21</b>          | 1.58               | 1.57         | -1.15                 | -1.81               |
| snap_10431 0035258-0.6 | 'stress.biotic'                     | CAP (Cysteine-rich secretory proteins, Antigen 5, and Pathogenesis-related 1 protein) superfamily protein | 1.73        | <b>2.92</b>          | 1.69               | -2.03        | -1.57                 | 1.29                |
| 537 0024475-0.2        | 'not assigned.unknown'              | Pathogenesis-related protein Bet v                                                                        | 1.57        | <b>2.19</b>          | 1.39               | -1.57        | 1.11                  | 1.74                |
| 2380 0021883-0.0       | 'not assigned.unknown'              | START-like domain Bet v                                                                                   | 1.89        | <b>2.39</b>          | 1.27               |              |                       |                     |
| 8639 0033693-0.0       | 'not assigned.unknown'              | START-like domain Bet v                                                                                   | 1.68        | <b>2.32</b>          | 1.38               |              |                       |                     |
| 8639 0033693-0.1       | 'not assigned.unknown'              | Pathogenesis-related protein Bet v                                                                        | 1.48        | <b>2.16</b>          | 1.46               | -2.07        | -1.96                 | 1.06                |
| snap_17168 0014271-0.1 | 'stress.abiotic'                    | Pathogenesis-related thaumatin superfamily protein                                                        | <b>2.30</b> | <b>2.23</b>          | -1.03              | -1.13        | 1.01                  | 1.14                |
| snap_19370 0001080-0.0 | 'stress.abiotic'                    | Pathogenesis-related thaumatin superfamily protein                                                        | 1.30        | <b>2.48</b>          | 1.92               | -1.31        | -2.52                 | -1.92               |
| snap_376 0040308-0.21  | 'stress.abiotic'                    | Pathogenesis-related thaumatin superfamily protein                                                        | 2.01        | <b>3.38</b>          | 1.68               | <b>-7.13</b> | -2.22                 | 3.21                |
| 509 0006343-0.3        | 'stress.biotic.PR-proteins'         | receptor like protein 12                                                                                  |             |                      |                    | <b>5.86</b>  | <b>7.09</b>           | 1.21                |
| 1247 0044125-0.3       | 'stress.biotic.respiratory burst'   | NADPH/respiratory burst oxidase protein D                                                                 | -1.23       | <b>2.31</b>          | <b>2.84</b>        |              |                       |                     |
| 783 0026874-0.6        | 'stress.biotic.signalling.MLO-like' | Seven transmembrane MLO family protein                                                                    | 2.11        | <b>5.35</b>          | <b>2.53</b>        | -2.29        | -1.44                 | 1.59                |
| 10465 0029861-0.0      | 'stress.biotic'                     | HXXXD-type acyl-transferase family protein                                                                | 1.75        | <b>7.07</b>          | <b>4.05</b>        | <b>-7.62</b> | -2.75                 | 2.77                |



|                   |                 |                                                              |              |              |              |               |                |               |
|-------------------|-----------------|--------------------------------------------------------------|--------------|--------------|--------------|---------------|----------------|---------------|
| 12352 0024047-0.0 | 'stress.biotic' | HXXXD-type acyl-transferase family protein                   | -1.29        | 1.05         | 1.35         | 3.56          | <b>9.25</b>    | 2.60          |
| 17121 0039368-0.0 | 'stress.biotic' | Plant basic secretory protein (BSP) family protein           | <b>2.39</b>  | <b>4.43</b>  | 1.86         | -1.61         | 1.55           | 2.50          |
| 11164 0016212-0.0 | 'stress.biotic' | Chitinase family protein                                     | 1.98         | <b>3.15</b>  | 1.59         | <b>-7.11</b>  | -1.77          | 4.03          |
| 13325 0046918-0.0 | 'stress.biotic' | Chitinase family protein                                     | 2.32         | <b>7.06</b>  | <b>3.04</b>  | <b>-4.63</b>  | -4.33          | 1.07          |
| 1983 0003140-0.1  | 'stress.biotic' | Chitinase family protein                                     | <b>4.55</b>  | <b>11.80</b> | <b>2.60</b>  | -3.25         | 1.12           | 3.65          |
| 21371 0046601-0.0 | 'stress.biotic' | Chitinase family protein                                     | -1.19        | <b>2.00</b>  | <b>2.36</b>  | -1.92         | -1.12          | 1.72          |
| 25915 0013866-0.0 | 'stress.biotic' | Chitinase family protein                                     | 1.66         | <b>3.14</b>  | 1.89         | -2.28         | -2.32          | -1.02         |
| 5518 0030549-0.0  | 'stress.biotic' | LRR and NB-ARC domains-containing disease resistance protein | 1.16         | -1.16        | -1.35        | 3.01          | <b>9.09</b>    | 3.02          |
| 274 0017642-1.2   | 'stress.biotic' | LRR and NB-ARC domains-containing disease resistance protein | -1.11        | 1.08         | 1.20         | <b>9.79</b>   | 4.11           | -2.38         |
| 476 0026821-0.2   | 'stress.biotic' | LRR and NB-ARC domains-containing disease resistance protein | -1.35        | 1.50         | <b>2.02</b>  | -1.15         | -1.00          | 1.15          |
| 10643 0016359-0.0 | 'stress.biotic' | NB-ARC domain-containing disease resistance protein          | 1.16         | 1.06         | -1.09        | 1.43          | <b>-4.98</b>   | <b>-7.13</b>  |
| 11308 0010204-0.1 | 'stress.biotic' | Disease resistance protein (CC-NBS-LRR class) family         | 1.33         | <b>4.66</b>  | <b>3.50</b>  |               |                |               |
| 31175 0012032-0.0 | 'stress.biotic' | NB-ARC domain-containing disease resistance protein          | 1.34         | -1.67        | <b>-2.23</b> | 2.62          | 1.89           | -1.38         |
| 3297 0040849-0.0  | 'stress.biotic' | RPS5-like 1                                                  | -1.18        | -1.23        | -1.05        | <b>-25.74</b> | 1.97           | <b>50.73</b>  |
| 1595 0025675-0.2  | 'stress.biotic' | LRR and NB-ARC domains-containing disease resistance protein | -1.28        | 1.73         | <b>2.21</b>  | -1.30         | 2.81           | 3.64          |
| 4245 0027234-0.0  | 'stress.biotic' | Disease resistance protein (CC-NBS-LRR class) family         |              |              |              | 1.68          | <b>-6.90</b>   | <b>-11.59</b> |
| 4364 0002974-0.2  | 'stress.biotic' | Disease resistance protein (CC-NBS-LRR class) family         | 1.40         | <b>2.46</b>  | 1.76         |               |                |               |
| 545 0031512-0.1   | 'stress.biotic' | LRR and NB-ARC domains-containing disease resistance protein | <b>-2.32</b> | -1.19        | 1.95         | 1.08          | 2.37           | 2.19          |
| 5593 0028879-0.1  | 'stress.biotic' | Disease resistance protein (CC-NBS-LRR class) family         | -1.63        | -1.50        | 1.09         | <b>-192.8</b> | 1.39           | <b>266.3</b>  |
| 6532 0046890-0.2  | 'stress.biotic' | Disease resistance protein (CC-NBS-LRR class) family         |              |              |              | -2.93         | <b>-1623.0</b> | <b>-606.3</b> |

|                   |                            |                                                      |              |              |              |               |               |               |
|-------------------|----------------------------|------------------------------------------------------|--------------|--------------|--------------|---------------|---------------|---------------|
| 695 0011193-0.3   | 'stress.biotic'            | NB-ARC domain-containing disease resistance protein  | 1.21         | 1.05         | -1.15        | -1.30         | <b>5.75</b>   | <b>7.46</b>   |
| 7128 0030119-0.0  | 'stress.biotic'            | Disease resistance protein (CC-NBS-LRR class) family | -1.10        | -1.26        | -1.14        | <b>-7.19</b>  | 1.13          | <b>8.12</b>   |
| 7492 0015655-0.0  | 'stress.biotic'            | NB-ARC domain-containing disease resistance protein  | 1.63         | <b>2.20</b>  | 1.35         |               |               |               |
| 888 0020833-0.4   | 'stress.biotic'            | basic chitinase                                      | <b>2.61</b>  | <b>4.82</b>  | 1.85         | -2.07         | -1.84         | 1.13          |
| 101 0001927-0.2   | 'not assigned.unknown'     | Putative disease resistance protein RGA1             | -2.04        | 1.22         | <b>2.49</b>  | 2.11          | -1.15         | -2.44         |
| 10403 0017285-0.2 | 'not assigned.unknown'     | Disease resistance protein RGA2                      | -1.38        | 1.34         | 1.84         | <b>-31.41</b> | -2.86         | <b>10.95</b>  |
| 14642 0039966-0.0 | 'not assigned.unknown'     | unknown protein                                      | -1.04        | <b>-2.16</b> | <b>-2.08</b> |               |               |               |
| 19048 0042926-0.0 | 'not assigned.no ontology' | Leucine-rich repeat (LRR) family protein             | -1.27        | 1.81         | <b>2.30</b>  | -2.18         | -2.76         | -1.27         |
| 6 0040996-1.2     | 'not assigned.unknown'     | unknown protein                                      | 1.01         | -1.40        | -1.41        | <b>-6.07</b>  | -1.54         | 3.95          |
| 903 0007606-0.3   | 'stress.biotic'            | NB-ARC domain-containing disease resistance protein  | -2.18        | 1.16         | <b>2.53</b>  | -2.71         | -2.05         | 1.32          |
| 12002 0041593-0.0 | 'stress'                   | cysteine-rich RLK (RECEPTOR-like protein kinase) 8   | -2.03        | 1.21         | <b>2.47</b>  | -1.02         | -2.48         | -2.42         |
| 13207 0000774-0.0 | 'stress'                   | cysteine-rich RLK (RECEPTOR-like protein kinase) 10  | -1.70        | 1.43         | <b>2.43</b>  | -1.28         | -1.07         | 1.20          |
| 13207 0000774-0.1 | 'stress'                   | cysteine-rich RLK (RECEPTOR-like protein kinase) 10  | -1.93        | 1.96         | <b>3.79</b>  | -2.28         | -1.41         | 1.62          |
| 14476 0031662-0.0 | 'stress'                   | cysteine-rich RLK (RECEPTOR-like protein kinase) 4   | -1.27        | 1.57         | 2.00         | <b>6.03</b>   | 2.00          | -3.01         |
| 15194 0021387-0.0 | 'stress'                   | cysteine-rich RLK (RECEPTOR-like protein kinase) 8   | 1.25         | <b>2.48</b>  | 1.98         | -1.58         | -2.39         | -1.52         |
| 1737 0036758-0.0  | 'stress'                   | S-locus lectin protein kinase family protein         | -1.01        | 1.24         | 1.26         | -1.10         | <b>-99.74</b> | <b>-91.58</b> |
| 2057 0007590-0.1  | 'stress'                   | cysteine-rich RLK (RECEPTOR-like protein kinase) 8   | 1.10         | 1.39         | 1.26         | <b>-145.9</b> | -1.69         | <b>86.31</b>  |
| 2891 0020639-0.1  | 'stress'                   | cysteine-rich RLK (RECEPTOR-like protein kinase) 8   | <b>-2.11</b> | 1.19         | <b>2.50</b>  | -1.02         | -1.73         | -1.69         |
| 3862 0004424-0.0  | 'stress'                   | cysteine-rich RLK (RECEPTOR-like protein kinase) 8   | 1.30         | <b>2.41</b>  | 1.85         | -2.02         | -1.18         | 1.71          |
| 4226 0017958-0.2  | 'stress'                   | cysteine-rich RLK (RECEPTOR-like protein kinase) 4   | -1.06        | <b>2.58</b>  | <b>2.74</b>  | -1.31         | -1.16         | 1.13          |
| 6395 0016207-0.0  | 'stress'                   | cysteine-rich RLK (RECEPTOR-like protein kinase) 19  | 1.47         | 1.74         | 1.18         | -3.78         | 2.55          | <b>9.64</b>   |

**Table S10-** DEGs encode proteins involved in ROS production and detoxification. Fold changes show in bold are statistically significant (FDR≤0.05) changed more than two times. Empty fold change cells are representative of not expressed gene in both compared strains.

| Gene ID           | Bincode Name                                  | Best annotation                          | Fold Change  |                      |                    |            |                       |                     |
|-------------------|-----------------------------------------------|------------------------------------------|--------------|----------------------|--------------------|------------|-----------------------|---------------------|
|                   |                                               |                                          | S WT-(E-)    | S $\Delta$ velA-(E-) | S $\Delta$ velA-WT | IP WT-(E-) | IP $\Delta$ velA-(E-) | IP $\Delta$ velA-WT |
| 11920 0032529-0.0 | 'misc.peroxidases'                            | Peroxidase superfamily protein           | -1.42        | 1.43                 | <b>2.02</b>        |            |                       |                     |
| 13363 0021942-0.0 | 'misc.peroxidases'                            | Peroxidase superfamily protein           | 1.50         | -1.48                | <b>-2.21</b>       |            |                       |                     |
| 191 0030881-1.2   | 'misc.peroxidases'                            | Peroxidase superfamily protein           | 1.22         | <b>2.30</b>          | 1.89               | -1.36      | 1.32                  | 1.80                |
| 29 0012215-0.0    | 'misc.peroxidases'                            | Peroxidase family protein                | -1.35        | 1.57                 | <b>2.12</b>        | 1.06       | 1.01                  | -1.05               |
| 13400 0019582-0.0 | 'misc.peroxidases'                            | Peroxidase superfamily protein           | 1.34         | <b>2.15</b>          | 1.61               |            |                       |                     |
| 3020 0043251-0.1  | 'misc.peroxidases'                            | Peroxidase superfamily protein           | -1.06        | <b>2.50</b>          | <b>2.66</b>        |            |                       |                     |
| 21563 0025807-0.0 | 'misc.peroxidases'                            | Peroxidase superfamily protein           | -1.34        | <b>-2.65</b>         | -1.97              |            |                       |                     |
| 2254 0004379-0.3  | 'misc.peroxidases'                            | Peroxidase superfamily protein           | -1.71        | <b>-7.17</b>         | <b>-4.20</b>       |            |                       |                     |
| 8229 0004594-0.0  | 'misc.peroxidases'                            | Peroxidase superfamily protein           | 1.48         | <b>2.66</b>          | 1.80               |            |                       |                     |
| 3783 0029599-0.2  | 'stress.abiotic.cold'                         | Peroxidase superfamily protein           | 1.09         | <b>-5.11</b>         | <b>-5.58</b>       |            |                       |                     |
| 27094 0033264-0.0 | 'stress.abiotic.cold'                         | Peroxidase superfamily protein           | <b>-2.45</b> | <b>-516.21</b>       | <b>-221.92</b>     |            |                       |                     |
| 16888 0036561-0.0 | 'stress.abiotic.cold'                         | Peroxidase superfamily protein           | -1.02        | 1.17                 | 1.20               | 1.70       | <b>-5.08</b>          | <b>-8.62</b>        |
| 8786 0035014-0.2  | 'redox.ascorbate and glutathione.glutathione' | glutathione peroxidase 7                 | <b>-3.73</b> | -1.18                | <b>3.16</b>        | 3.75       | 4.30                  | 1.15                |
| 30 0030220-2.0    | 'misc.glutathione S transferases'             | glutathione S-transferase tau 7          | <b>-2.26</b> | 1.20                 | <b>2.71</b>        | -2.31      | -3.35                 | -1.45               |
| 1335 0041028-0.3  | 'misc.glutathione S transferases'             | glutathione S-transferase tau 4          | 1.28         | <b>3.09</b>          | <b>2.42</b>        | -2.67      | 1.06                  | 2.82                |
| 4704 0007237-0.2  | 'misc.glutathione S transferases'             | glutathione S-transferase 6              | -1.87        | 1.11                 | <b>2.07</b>        | 1.68       | 1.91                  | 1.14                |
| 4704 0007237-0.3  | 'misc.glutathione S transferases'             | glutathione S-transferase 6              | -1.99        | 1.11                 | <b>2.21</b>        | 1.27       | -1.08                 | -1.37               |
| 17715 0008450-0.0 | 'misc.glutathione S transferases'             | Glutathione S-transferase family protein | <b>-2.67</b> | <b>-2.84</b>         | -1.07              |            |                       |                     |
| 1565 0043379-0.0  | 'misc.glutathione S transferases'             | Glutathione S-transferase family protein | 1.35         | -1.57                | <b>-2.13</b>       | -1.13      | -2.94                 | -2.61               |
| 4382 0037315-0.0  | 'misc.glutathione S transferases'             | glutathione S-transferase 6              | <b>2.57</b>  | <b>7.37</b>          | <b>2.87</b>        | -3.17      | 1.23                  | 3.89                |
| 5539 0043047-0.0  | 'misc.glutathione S transferases'             | Peroxidase superfamily protein           | <b>2.48</b>  | <b>21.58</b>         | <b>8.70</b>        | -3.01      | -2.11                 | 1.43                |
| 5539 0043047-0.1  | 'misc.glutathione S transferases'             | Peroxidase superfamily protein           | 1.07         | <b>4.52</b>          | <b>4.21</b>        | -3.94      | -2.99                 | 1.32                |

|                   |                                                  |                                             |              |              |              |              |              |              |
|-------------------|--------------------------------------------------|---------------------------------------------|--------------|--------------|--------------|--------------|--------------|--------------|
| 3511 0019559-0.2  | 'misc.glutathione S transferases'                | glutathione S-transferase TAU 18            | -1.23        | <b>-2.49</b> | -2.03        |              |              |              |
| 11527 0037060-0.0 | 'misc.glutathione S transferases'                | glutathione S-transferase tau 4             | -1.19        | <b>2.36</b>  | <b>2.80</b>  | -2.30        | -1.10        | 2.09         |
| 2254 0004379-0.5  | 'misc.glutathione S transferases'                | glutathione S-transferase TAU 18            | -1.53        | 1.01         | 1.55         | <b>-8.07</b> | -4.22        | 1.91         |
| 869 0011605-0.1   | 'misc.glutathione S transferases'                | Peroxidase superfamily protein              | 1.76         | <b>2.68</b>  | 1.53         |              |              |              |
| 28602 0004008-0.0 | 'misc.glutathione S transferases'                | Glutathione S-transferase family protein    | 1.44         | -1.61        | <b>-2.31</b> | -1.12        | 1.00         | 1.12         |
| 8786 0035014-0.2  | 'redox.ascorbate and<br>glutathione.glutathione' | glutathione peroxidase 7                    | <b>-3.73</b> | -1.18        | <b>3.16</b>  | 3.75         | 4.30         | 1.15         |
| 5890 0031114-0.6  | redox.thioredoxin'                               | tetratricopeptide-repeat thioredoxin-like 2 | 1.16         | 1.31         | 1.13         | 1.70         | <b>-3.72</b> | <b>-6.34</b> |
| 7843 0005643-0.1  | 'redox.thioredoxin'                              | thioredoxin F-type 1                        | <b>-2.24</b> | -1.52        | 1.48         | 1.69         | 2.13         | 1.27         |
| 20777 0001419-0.0 | 'redox.ascorbate and glutathione'                | cytochrome B5 isoform B                     | 2.67         | <b>5.55</b>  | 2.08         |              |              |              |
| 3042 0007389-0.0  | 'redox.ascorbate and<br>glutathione.ascorbate'   | Plant L-ascorbate oxidase                   | 1.09         | <b>2.71</b>  | <b>2.48</b>  | 1.62         | -1.20        | -1.94        |
| 542 0031513-0.2   | 'redox.heme'                                     | haemoglobin 2                               | 1.44         | <b>15.83</b> | <b>11.07</b> |              |              |              |

**Table S11-** DEGs encode proteins involved in hormone metabolism. Fold changes show in bold are statistically significant (FDR≤0.05) changed more than two times. Empty fold change cells are representative of not expressed gene in both compared strains.

| Gene ID              | Bincode Name                                                                                  | Best annotation                                                                    | Fold Change   |                          |                        |                |                           |                         |
|----------------------|-----------------------------------------------------------------------------------------------|------------------------------------------------------------------------------------|---------------|--------------------------|------------------------|----------------|---------------------------|-------------------------|
|                      |                                                                                               |                                                                                    | S WT-<br>(E-) | S $\Delta$ veIA-<br>(E-) | S $\Delta$ veIA-<br>WT | IP WT-<br>(E-) | IP $\Delta$ veIA-<br>(E-) | IP $\Delta$ veIA-<br>WT |
| Brassinosteroid (BR) |                                                                                               |                                                                                    |               |                          |                        |                |                           |                         |
| 12035 0036245-0.0    | 'hormone<br>metabolism.brassinosteroid.synthesis-<br>degradation.sterols.CYP51'               | cytochrome P450, family<br>707, subfamily A,<br>polypeptide 4                      | 2.98          | 4.20                     | 1.41                   |                |                           |                         |
| 529 0042161-0.4      | 'hormone<br>metabolism.brassinosteroid.synthesis-<br>degradation.sterols.CYP51'               | cytochrome P450, family<br>707, subfamily A,<br>polypeptide 4                      | -2.65         | -4.45                    | -1.68                  | 1.18           | -1.24                     | -1.46                   |
| 6857 0012593-0.0     | 'hormone<br>metabolism.brassinosteroid.synthesis-<br>degradation.sterols.CYP51'               | cytochrome P450, family<br>707, subfamily A,<br>polypeptide 4                      | 2.54          | 2.21                     | -1.15                  | -1.60          | 1.18                      | 1.88                    |
| 11890 0002733-0.0    | 'hormone<br>metabolism.brassinosteroid.synthesis-<br>degradation.sterols.CYP51'               | cytochrome P450, family<br>707, subfamily A,<br>polypeptide 4                      | -1.37         | -107.83                  | -79.88                 |                |                           |                         |
| Jasmonic acid (JA)   |                                                                                               |                                                                                    |               |                          |                        |                |                           |                         |
| 3901 0030125-0.0     | hormone metabolism.jasmonate.synthesis-<br>degradation.12-Oxo-PDA-reductase'                  | 12-oxophytodienoate<br>reductase 1                                                 | -1.12         | 1.58                     | 1.77                   | -6.39          | -1.59                     | 4.02                    |
| 15130 0032139-0.0    | 'hormone<br>metabolism.jasmonate.synthesis-<br>degradation.12-Oxo-PDA-reductase'              | 12-oxophytodienoate<br>reductase 2                                                 | 1.33          | 2.17                     | 1.63                   | -1.34          | -2.56                     | -1.91                   |
| 9293 0011514-0.0     | 'hormone<br>metabolism.jasmonate.synthesis-<br>degradation.jasmonate-O-<br>methyltransferase' | S-adenosyl-L-methionine-<br>dependent<br>methyltransferases<br>superfamily protein | 1.45          | -1.55                    | -2.25                  | 1.55           | 1.03                      | -1.50                   |
| 3223 0047938-0.2     | 'hormone<br>metabolism.jasmonate.synthesis-<br>degradation.jasmonate-O-<br>methyltransferase' | S-adenosyl-L-methionine-<br>dependent<br>methyltransferases<br>superfamily protein | -1.97         | -1.38                    | 1.42                   | 1.46           | 4.94                      | 3.38                    |
| 1134 0047379-0.0     | 'hormone<br>metabolism.jasmonate.synthesis-<br>degradation.jasmonate-O-<br>methyltransferase' | S-adenosyl-L-methionine-<br>dependent<br>methyltransferases<br>superfamily protein | 1.29          | 2.27                     | 1.76                   | 1.42           | -1.49                     | -2.11                   |

|                            |                                                                                                             |                                                         |              |             |              |               |                |               |
|----------------------------|-------------------------------------------------------------------------------------------------------------|---------------------------------------------------------|--------------|-------------|--------------|---------------|----------------|---------------|
| 3877 0034879-0.1           | 'hormone metabolism.jasmonate.synthesis-degradation.lipoxygenase'                                           | PLAT/LH2 domain-containing lipoxygenase family protein  | -1.39        | 1.49        | <b>2.07</b>  | -2.92         | -2.49          | 1.18          |
| 786 0026877-0.0            | 'hormone metabolism.jasmonate.synthesis-degradation.lipoxygenase'                                           | PLAT/LH2 domain-containing lipoxygenase family protein  | -1.30        | <b>8.75</b> | <b>11.41</b> | <b>-6.92</b>  | <b>-210.46</b> | <b>-30.41</b> |
| 14669 0004090-0.0          | 'hormone metabolism.jasmonate.synthesis-degradation.lipoxygenase'                                           | PLAT/LH2 domain-containing lipoxygenase family protein  | 1.05         | <b>2.01</b> | 1.92         | -1.68         | -1.88          | -1.13         |
| 12318 0000453-0.2          | 'hormone metabolism.jasmonate.synthesis-degradation.lipoxygenase'                                           | PLAT/LH2 domain-containing lipoxygenase family protein  | -1.88        | -1.30       | 1.45         | <b>-15.85</b> | <b>-24.25</b>  | -1.53         |
| 7715 0034244-0.1           | 'hormone metabolism.jasmonate.synthesis-degradation.lipoxygenase'                                           | PLAT/LH2 domain-containing lipoxygenase family protein  | 1.21         | 1.66        | 1.37         | <b>-5.02</b>  | <b>-29.79</b>  | <b>-5.93</b>  |
| 10098 0041679-0.1          | 'hormone metabolism.jasmonate.synthesis-degradation.lipoxygenase'                                           | PLAT/LH2 domain-containing lipoxygenase family protein  | -1.88        | 1.37        | <b>2.58</b>  | -1.16         | -1.48          | -1.28         |
| <b>Salicylic acid (SA)</b> |                                                                                                             |                                                         |              |             |              |               |                |               |
| 4452 0035376-0.1           | 'hormone metabolism.salicylic acid.synthesis-degradation'                                                   | UDP-glycosyltransferase 74 F1                           | -1.43        | 1.69        | <b>2.42</b>  | -1.41         | 1.42           | 2.01          |
| <b>Abscisic acid (ABA)</b> |                                                                                                             |                                                         |              |             |              |               |                |               |
| 812 0040415-0.2            | 'hormone metabolism.abscisic acid.signal transduction'                                                      | highly ABA-induced PP2C gene 2                          | -1.15        | 1.21        | 1.39         | 1.60          | <b>6.27</b>    | 3.92          |
| 5258 0040140-0.0           | 'hormone metabolism.abscisic acid.synthesis-degradation'                                                    | aldehyde oxidase 2                                      | 1.08         | -1.06       | -1.15        | <b>-9.09</b>  | -2.31          | 3.94          |
| 7065 0030538-0.3           | 'hormone metabolism.abscisic acid.synthesis-degradation'                                                    | aldehyde oxidase 2                                      | -1.14        | 1.20        | 1.37         | <b>5.10</b>   | 2.08           | -2.45         |
| 767 0012406-0.0            | 'hormone metabolism.abscisic acid.synthesis-degradation.degradation.8-hydroxylase'                          | cytochrome P450, family 707, subfamily A, polypeptide 3 | -1.61        | 1.41        | <b>2.27</b>  | <b>5.78</b>   | -1.17          | <b>-6.76</b>  |
| 3566 0012299-0.0           | 'hormone metabolism.abscisic acid.synthesis-degradation.synthesis.short chain alcohol dehydrogenase (ABA2)' | NAD                                                     | 1.68         | <b>3.45</b> | 2.05         |               |                |               |
| 658 0032726-0.3            | 'hormone metabolism.abscisic acid.synthesis-degradation.synthesis.zeaxanthin epoxidase'                     | FAD/NAD                                                 | <b>-3.50</b> | -1.26       | <b>2.77</b>  | 2.74          | 3.02           | 1.10          |
| <b>Auxin</b>               |                                                                                                             |                                                         |              |             |              |               |                |               |
| 2098 0032594-0.0           | 'hormone metabolism.auxin'                                                                                  | methyl esterase 18                                      | -1.91        | 1.18        | <b>2.25</b>  | -1.10         | 1.87           | 2.06          |

|                             |                                                                      |                                                              |              |             |              |              |                |                 |
|-----------------------------|----------------------------------------------------------------------|--------------------------------------------------------------|--------------|-------------|--------------|--------------|----------------|-----------------|
| 765 0012408-0.2             | 'hormone metabolism.auxin.induced-regulated-responsive-activated'    | Auxin-responsive GH3 family protein                          |              |             |              | -1.91        | <b>-5.16</b>   | -2.70           |
| 1613 0046846-0.1            | 'hormone metabolism.auxin.induced-regulated-responsive-activated'    | NAD                                                          | 1.39         | -1.56       | <b>-2.16</b> | -1.69        | -1.76          | -1.04           |
| 1566 0043380-0.0            | 'hormone metabolism.auxin.induced-regulated-responsive-activated'    | NAD                                                          | -1.94        | -1.58       | 1.23         | <b>5.71</b>  | 2.66           | -2.15           |
| 3065 0019997-0.0            | 'hormone metabolism.auxin.induced-regulated-responsive-activated'    | NAD                                                          | <b>-3.46</b> | 1.12        | <b>3.88</b>  | -1.14        | -1.25          | -1.09           |
| 3870 0034872-0.1            | 'hormone metabolism.auxin.induced-regulated-responsive-activated'    | AUX/IAA transcriptional regulator family protein             | -1.11        | 2.07        | <b>2.31</b>  |              |                |                 |
| 7380 0034159-0.0            | 'hormone metabolism.auxin.induced-regulated-responsive-activated'    | Auxin-responsive GH3 family protein                          | -1.16        | <b>2.82</b> | <b>3.28</b>  | -1.39        | 1.60           | 2.22            |
| 446 0044598-0.2             | 'hormone metabolism.auxin.induced-regulated-responsive-activated'    | NAD                                                          | 1.48         | -1.58       | <b>-2.34</b> |              |                |                 |
| 16122 0031619-0.0           | 'hormone metabolism.auxin.induced-regulated-responsive-activated'    | Auxin-responsive family protein                              | -1.43        | 1.41        | <b>2.02</b>  | -1.42        | -2.14          | -1.51           |
| 549 0031519-0.5             | 'hormone metabolism.auxin.signal transduction'                       | Auxin efflux carrier family protein                          | 1.45         | -1.50       | <b>-2.17</b> | 1.22         | -1.43          | -1.74           |
| 549 0031519-0.6             | 'hormone metabolism.auxin.signal transduction'                       | Auxin efflux carrier family protein                          | 1.40         | -1.61       | <b>-2.27</b> | 1.23         | -2.02          | -2.48           |
| <b>Cytokinin (CK)</b>       |                                                                      |                                                              |              |             |              |              |                |                 |
| 4523 0038435-snap-gene-0.14 | 'hormone metabolism.cytokinin.synthesis-degradation'                 | cytokinin oxidase/dehydrogenase 6                            | -1.98        | 1.56        | <b>3.09</b>  |              |                |                 |
| 237 0040978-1.0             | 'hormone metabolism.cytokinin.synthesis-degradation'                 | UDP-glucosyl transferase 85A2                                | 2.04         | <b>7.70</b> | <b>3.78</b>  | -2.37        | 1.43           | 3.39            |
| 12802 0010595-0.1           | 'hormone metabolism.cytokinin.synthesis-degradation'                 | cytokinin oxidase/dehydrogenase 6                            | 1.76         | <b>3.50</b> | 1.99         | 1.25         | 1.20           | -1.05           |
| 1477 0040490-0.2            | 'hormone metabolism.cytokinin.synthesis-degradation'                 | cytokinin oxidase/dehydrogenase 1                            | -1.56        | 1.64        | <b>2.56</b>  | -2.12        | -2.04          | 1.04            |
| 21174 0004587-0.0           | 'hormone metabolism.cytokinin.synthesis-degradation'                 | UDP-glucosyl transferase 85A3                                | <b>-2.16</b> | 1.01        | <b>2.17</b>  | 4.27         | -1.60          | <b>-6.83</b>    |
| 569 0019014-0.3             | 'misc.cytochrome P450'                                               | cytochrome P450, family 735, subfamily A, polypeptide 2      | 1.18         | 1.17        | -1.01        | <b>13.45</b> | <b>-127.43</b> | <b>-1871.42</b> |
| <b>Ethylene</b>             |                                                                      |                                                              |              |             |              |              |                |                 |
| 19592 0025930-0.0           | 'hormone metabolism.ethylene.induced-regulated-responsive-activated' | Adenine nucleotide alpha hydrolases-like superfamily protein | <b>-2.72</b> | <b>2.95</b> | <b>8.03</b>  |              |                |                 |
| 730 0019653-0.3             | 'hormone metabolism.ethylene.signal transduction'                    | Integrase-type DNA-binding superfamily protein               | -1.14        | <b>2.65</b> | <b>3.03</b>  |              |                |                 |

|                              |                                                                                                |                                     |             |              |             |               |       |               |
|------------------------------|------------------------------------------------------------------------------------------------|-------------------------------------|-------------|--------------|-------------|---------------|-------|---------------|
| 14174 0020942-0.0            | 'hormone metabolism.ethylene.synthesis-degradation.1-aminocyclopropane-1-carboxylate oxidase'  | 2-oxoglutarate                      | 2.16        | <b>13.19</b> | <b>6.10</b> |               |       |               |
| 21938 0036377-0.0            | 'hormone metabolism.ethylene.synthesis-degradation.1-aminocyclopropane-1-carboxylate synthase' | ACC synthase 1                      | 1.30        | <b>2.46</b>  | 1.90        |               |       |               |
| <b>Gibberellic acid (GA)</b> |                                                                                                |                                     |             |              |             |               |       |               |
| 2519 0039696-0.0             | 'hormone metabolism.gibberelin.synthesis-degradation.ent-kaurene oxidase'                      | Cytochrome P450 superfamily protein | 1.40        | <b>2.19</b>  | 1.57        | 1.03          | 1.12  | 1.09          |
| 4368 0002962-0.1             | 'hormone metabolism.gibberelin.synthesis-degradation.ent-kaurene synthase'                     | terpene synthase 04                 | 2.06        | <b>3.89</b>  | 1.89        | -3.37         | 1.19  | 4.01          |
| 7191 0025967-0.1             | 'hormone metabolism.gibberelin.synthesis-degradation.GA2 oxidase'                              | gibberellin 2-oxidase               | -1.64       | 1.36         | <b>2.22</b> |               |       |               |
| 5374 0030002-0.0             | 'hormone metabolism.gibberelin.synthesis-degradation.GA2 oxidase'                              | gibberellin 2-oxidase 3             | 1.97        | 1.12         | -1.76       | 3.69          | -2.73 | <b>-10.06</b> |
| 3140 0022390-0.2             | 'hormone metabolism.gibberelin.synthesis-degradation.GA20 oxidase'                             | gibberellin 20 oxidase 2            | -1.60       | 1.78         | <b>2.84</b> |               |       |               |
| <b>Not defined</b>           |                                                                                                |                                     |             |              |             |               |       |               |
| 2664 0005249-0.1             | 'hormone metabolism'                                                                           | acetone-cyanohydrin lyase           | <b>2.42</b> | <b>4.44</b>  | 1.84        | <b>-23.36</b> | -2.42 | <b>9.65</b>   |
| 2664 0005249-0.2             | 'hormone metabolism'                                                                           | acetone-cyanohydrin lyase           | <b>3.79</b> | <b>4.51</b>  | 1.19        |               |       |               |
